# Supplementary material for: Alterations in the Fecal Microbiota of Patients with HIV-1 Infection: An Observational Study in A Chinese Population
Source: PubMed Central journal article supplement (PMC4967929; doi:10.1038/srep30673), 2016-08-01
Supplement: srep30673-s1.pdf [file srep30673-s1.pdf]

## Supplementary Information

### **Alterations in the Fecal Microbiota of Patients with HIV-1 Infection: An Observational Study in A Chinese Population**

**Zongxin Ling<sup>1\*</sup>, Changzhong Jin<sup>1\*</sup>, Tiansheng Xie<sup>1</sup>, Yiwen Cheng<sup>1</sup>, Lanjuan Li<sup>1§</sup>,  
Nanping Wu<sup>1#</sup>**

<sup>1</sup> Collaborative Innovation Center for Diagnosis and Treatment of Infectious Diseases, State Key Laboratory for Diagnosis and Treatment of Infectious Diseases, the First Affiliated Hospital, School of Medicine, Zhejiang University, Hangzhou, Zhejiang, 310003, China

\*These authors contribute equally to this work.

#Corresponding author; §Co-corresponding author

**Running title:** HIV-1 infection altered fecal microbiota

#### **Corresponding author:**

Nanping Wu, State Key Laboratory for Diagnosis and Treatment of Infectious Diseases, the First Affiliated Hospital, School of Medicine, Zhejiang University, Hangzhou, Zhejiang, 310003, China. E-mail: [flwnp2013@163.com](mailto:flwnp2013@163.com). Tel.: +86-571-8723-6580; Fax: +86-571-8723-6580.

Lanjuan Li, State Key Laboratory for Diagnosis and Treatment of Infectious Diseases, the First Affiliated Hospital, School of Medicine, Zhejiang University, Hangzhou, Zhejiang, 310003, China. E-mail: [ljli@zju.edu.cn](mailto:ljli@zju.edu.cn). Tel.: +86-571-8723-6458; Fax: +86-571-8723- 6459.

**Figure S1** Rarefaction analysis of pyrosequencing tags in the fecal microbiota from HIV-1-infected subjects (n=67) and healthy controls (n=16).

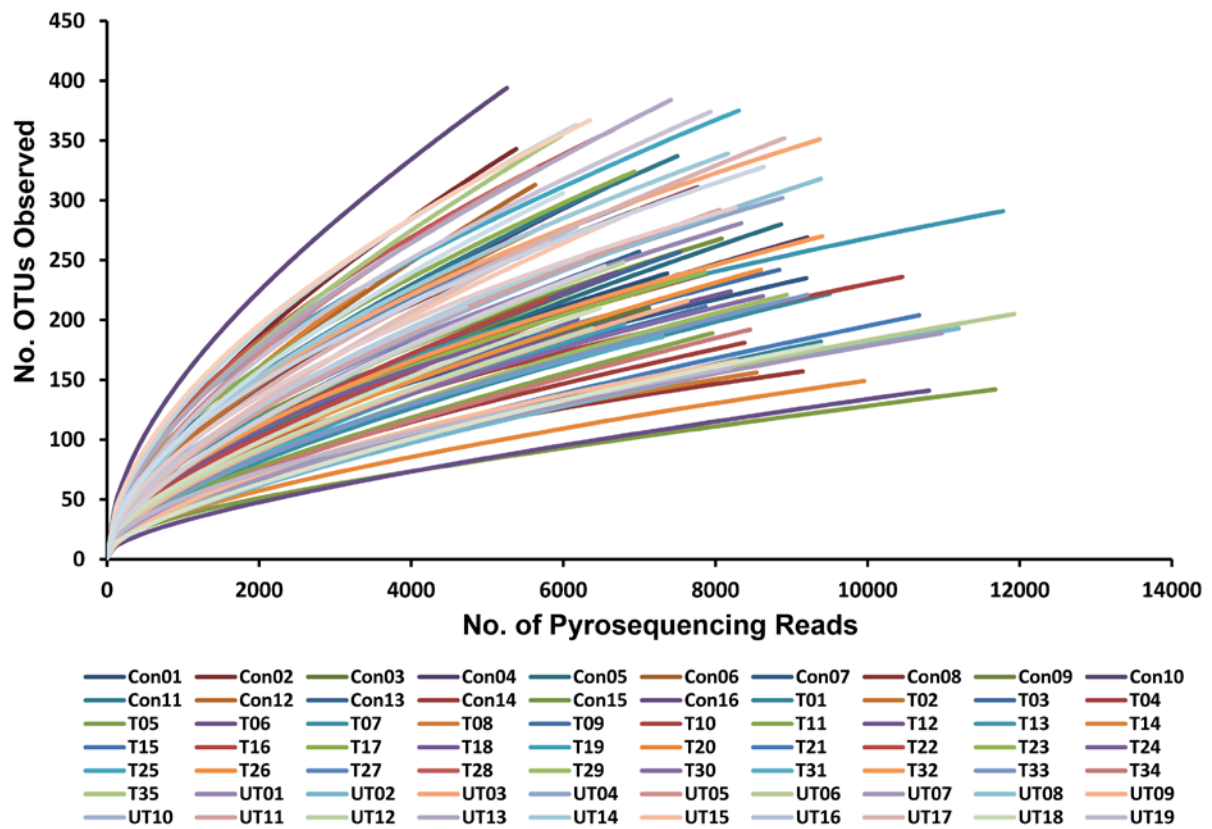

**Figure S2** Differentiation in bacterial communities from all participants (interindividual variations). Community differentiation was measured by using the unweighted UniFrac algorithm; the scale bar indicated the distance between clusters in UniFrac units.

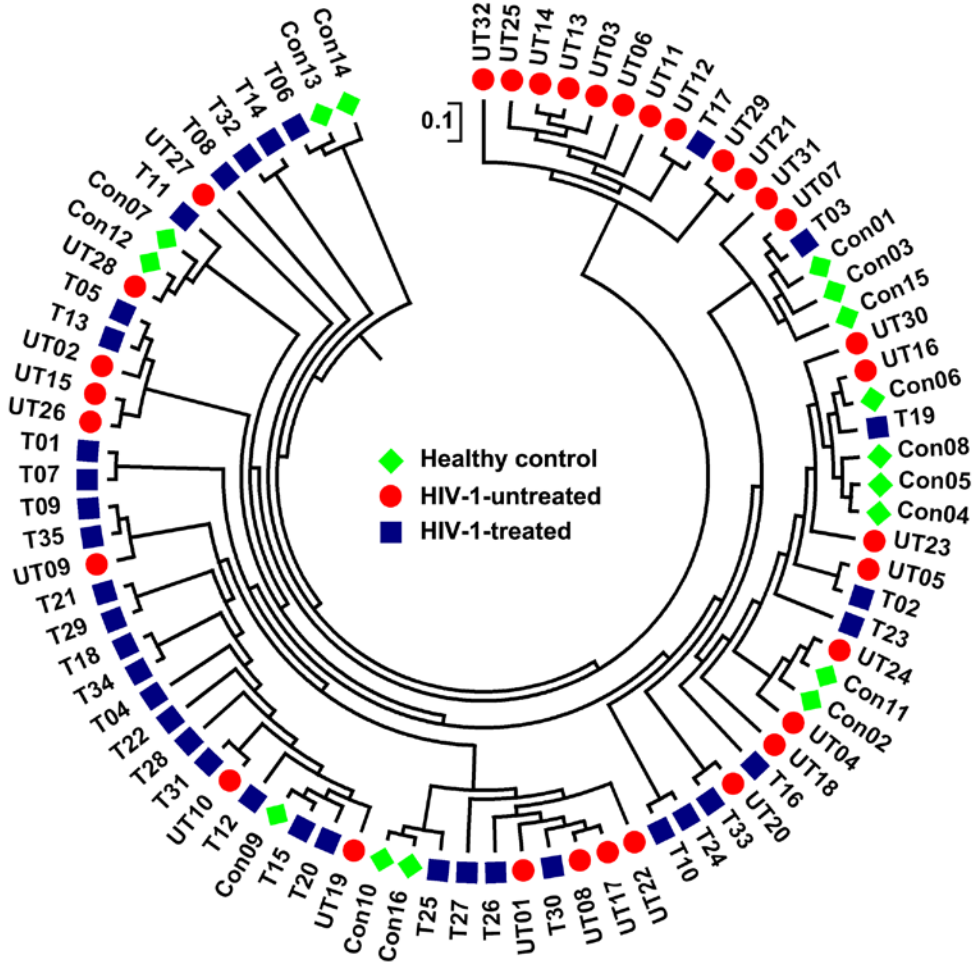

**Figure S3** Heatmap indicating the genus-level changes in the healthy control, treated and untreated HIV-1 subjects. The relative abundance of the bacteria in each genus is indicated by a gradient of colour from green (low abundance) to red (high abundance). Complete linkage clustering of the samples was based on the genus-level composition and abundance of the fecal microbiota.

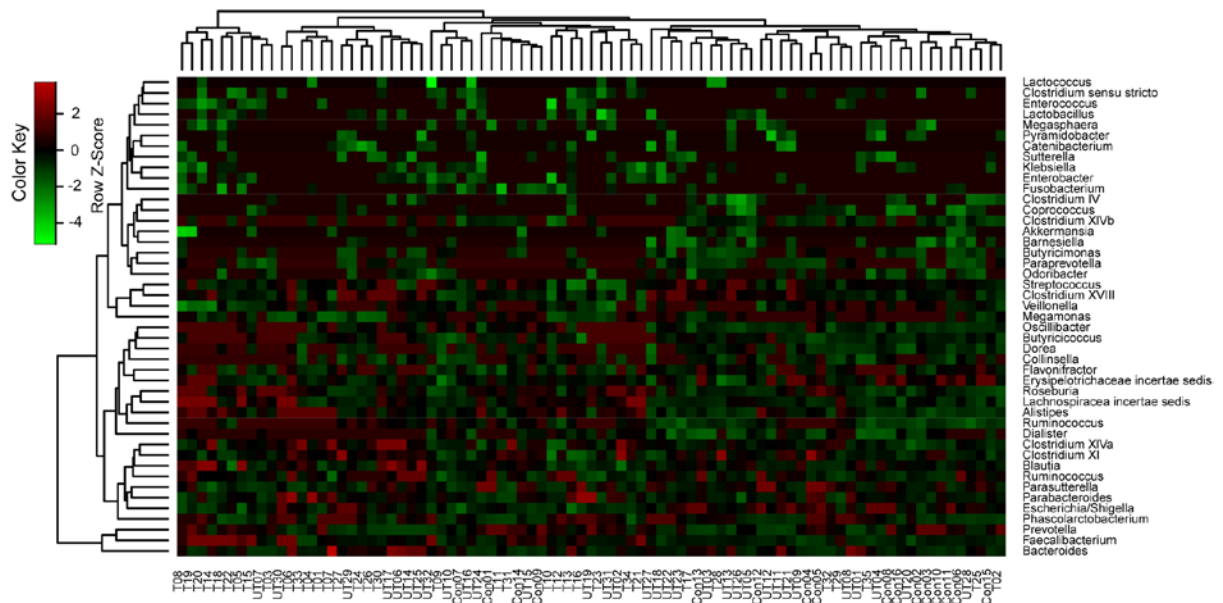

**Figure S4** Taxonomic differences of fecal microbiota between healthy controls and HAART treated HIV-1-infected subjects. Cladogram representing the features that are discriminative with respect to treatment using the LDA model results on the bacterial hierarchy (A). LDA coupled with effect size measurements identifies the most differentially abundant taxa between the two groups (B).

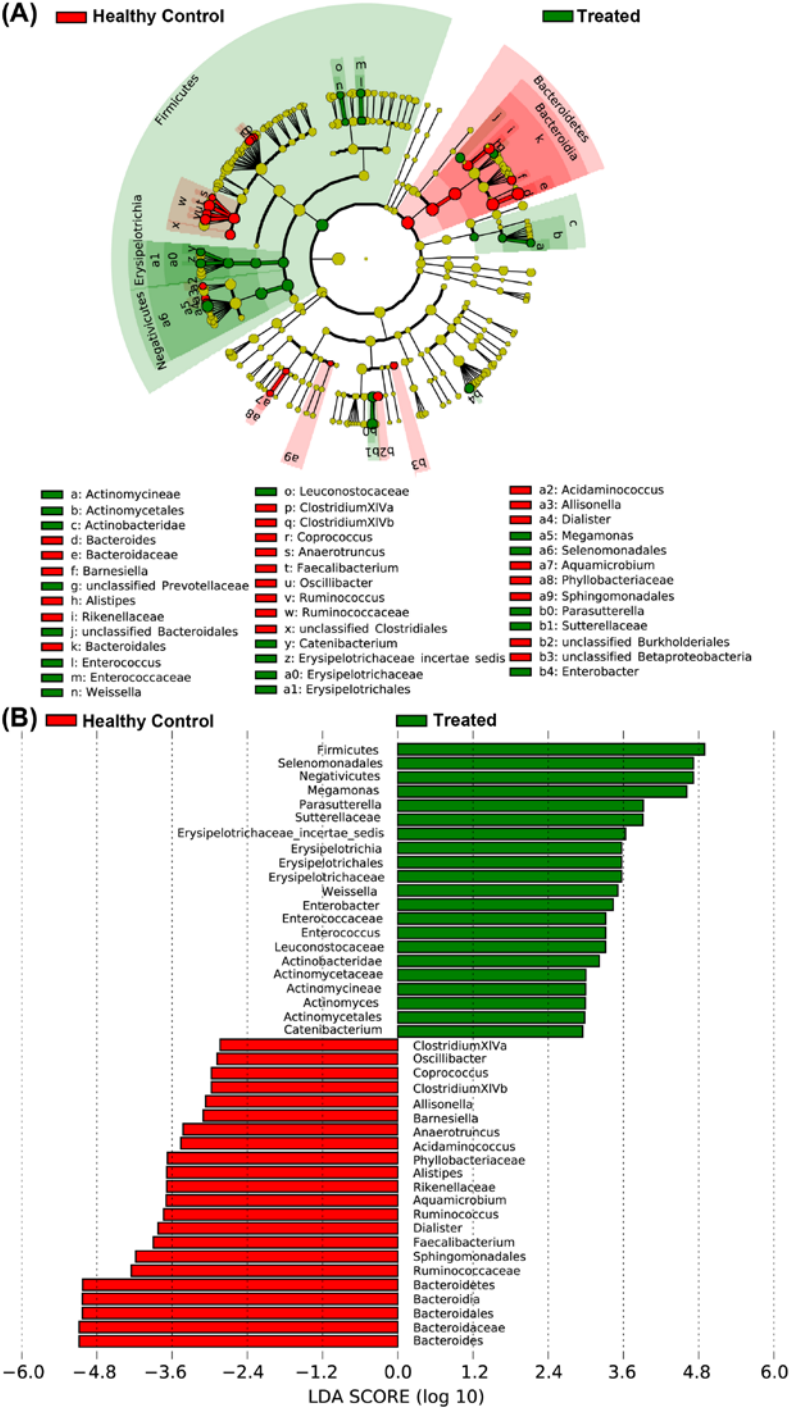

**Table S1 Comparison of phylotypes coverage and diversity estimation of the 16S rRNA gene libraries for individuals at 97% similarity from the pyrosequencing analysis**

| <b>Sample ID</b> | <b>No. of Reads</b> | <b>No. of OTUs</b> | <b>Good's Coverage</b> | <b>ACE</b> | <b>ACE_lci</b> | <b>ACE_hci</b> | <b>Chao1</b> | <b>Chao1_lci</b> | <b>Chao1_hci</b> | <b>Shannon</b> | <b>Simpson</b> |
|------------------|---------------------|--------------------|------------------------|------------|----------------|----------------|--------------|------------------|------------------|----------------|----------------|
| Con01            | 7365                | 239                | 98.0584%               | 843        | 714.5          | 1006.9         | 630          | 475.4            | 883.9            | 2.085206       | 0.30297        |
| Con02            | 5379                | 343                | 96.0402%               | 1387       | 1216.9         | 1589.6         | 953          | 744.3            | 1271.0           | 3.310404       | 0.086537       |
| Con03            | 7126                | 210                | 98.2599%               | 821        | 701.0          | 970.5          | 557          | 412.0            | 804.7            | 2.662927       | 0.141614       |
| Con04            | 9209                | 269                | 98.1974%               | 1019       | 879.8          | 1191.2         | 684          | 531.6            | 924.9            | 2.006812       | 0.30957        |
| Con05            | 8862                | 280                | 97.8786%               | 1691       | 1467.7         | 1955.8         | 813          | 621.7            | 1110.4           | 1.929828       | 0.346841       |
| Con06            | 7902                | 239                | 98.2663%               | 914        | 790.6          | 1064.6         | 584          | 447.7            | 809.4            | 1.974576       | 0.405863       |
| Con07            | 9194                | 235                | 98.5534%               | 906        | 780.1          | 1060.2         | 549          | 424.7            | 753.2            | 2.51041        | 0.203632       |
| Con08            | 7769                | 311                | 97.7088%               | 1251       | 1098.7         | 1432.8         | 677          | 550.6            | 871.1            | 2.592892       | 0.249259       |
| Con09            | 7367                | 254                | 97.6245%               | 1771       | 1533.1         | 2053.7         | 798          | 593.7            | 1124.3           | 1.942609       | 0.358986       |
| Con10            | 6579                | 311                | 96.9144%               | 1870       | 1648.7         | 2128.9         | 865          | 673.6            | 1157.7           | 2.642677       | 0.176366       |
| Con11            | 7498                | 337                | 97.2259%               | 1797       | 1562.2         | 2075.7         | 875          | 692.9            | 1151.0           | 3.499962       | 0.070839       |
| Con12            | 5629                | 313                | 96.2516%               | 1346       | 1140.4         | 1602.2         | 965          | 737.2            | 1313.9           | 2.874179       | 0.166054       |
| Con13            | 6997                | 257                | 97.6847%               | 1101       | 951.7          | 1282.7         | 678          | 520.7            | 928.1            | 2.109666       | 0.328161       |
| Con14            | 9145                | 157                | 99.1143%               | 427        | 362.4          | 513.0          | 328          | 248.6            | 474.4            | 0.98824        | 0.693169       |
| Con15            | 8081                | 268                | 98.0695%               | 1133       | 980.4          | 1317.7         | 563          | 456.9            | 728.3            | 2.820013       | 0.135682       |
| Con16            | 5258                | 394                | 95.4355%               | 1764       | 1564.6         | 1998.0         | 1238         | 949.5            | 1674.9           | 3.985995       | 0.04325        |
| T01              | 9386                | 182                | 98.6895%               | 1321       | 1109.0         | 1580.3         | 523          | 380.6            | 767.7            | 2.006821       | 0.253362       |
| T02              | 5767                | 279                | 96.9828%               | 1313       | 1139.9         | 1521.5         | 749          | 577.2            | 1020.8           | 3.063237       | 0.104074       |
| T03              | 7534                | 257                | 97.7568%               | 1767       | 1538.1         | 2037.3         | 874          | 631.7            | 1273.8           | 2.545075       | 0.19649        |
| T04              | 8381                | 181                | 98.6278%               | 966        | 811.1          | 1158.4         | 567          | 395.9            | 872.9            | 2.010176       | 0.253947       |
| T05              | 11678               | 142                | 99.2036%               | 975        | 781.2          | 1227.7         | 427          | 293.7            | 678.0            | 1.795711       | 0.269719       |
| T06              | 10807               | 141                | 99.1209%               | 981        | 808.4          | 1197.5         | 404          | 283.7            | 624.4            | 1.264756       | 0.518475       |
| T07              | 9502                | 222                | 98.4740%               | 1244       | 1065.5         | 1461.3         | 582          | 443.1            | 808.2            | 2.30018        | 0.170175       |
| T08              | 8540                | 156                | 98.9813%               | 546        | 452.2          | 668.4          | 423          | 295.4            | 668.3            | 1.890385       | 0.337688       |

|      |       |     |          |      |        |        |      |       |        |          |          |
|------|-------|-----|----------|------|--------|--------|------|-------|--------|----------|----------|
| T09  | 8839  | 242 | 98.3935% | 920  | 791.5  | 1078.0 | 659  | 491.9 | 938.2  | 2.845907 | 0.116446 |
| T10  | 10457 | 236 | 98.7281% | 828  | 704.2  | 985.4  | 561  | 431.9 | 775.5  | 3.121317 | 0.071766 |
| T11  | 7959  | 189 | 98.3289% | 2111 | 1800.6 | 2481.9 | 738  | 496.9 | 1166.5 | 2.31031  | 0.235507 |
| T12  | 6703  | 240 | 97.5981% | 1318 | 1102.4 | 1587.4 | 755  | 554.6 | 1083.6 | 2.770615 | 0.142851 |
| T13  | 11782 | 291 | 98.7948% | 760  | 670.2  | 870.3  | 535  | 445.4 | 677.2  | 2.068306 | 0.384602 |
| T14  | 3384  | 227 | 95.5674% | 1015 | 852.9  | 1219.2 | 641  | 480.2 | 903.7  | 2.965745 | 0.116657 |
| T15  | 7870  | 211 | 98.3227% | 1053 | 888.7  | 1256.0 | 571  | 424.9 | 817.6  | 1.677983 | 0.486193 |
| T16  | 5788  | 218 | 97.5294% | 1012 | 839.7  | 1232.2 | 726  | 515.0 | 1085.6 | 2.572738 | 0.139605 |
| T17  | 6935  | 324 | 97.2747% | 1219 | 1061.4 | 1409.2 | 792  | 628.5 | 1041.9 | 3.231576 | 0.13887  |
| T18  | 8200  | 224 | 98.4146% | 1121 | 966.4  | 1307.7 | 547  | 417.0 | 763.0  | 2.535918 | 0.165445 |
| T19  | 6807  | 197 | 98.0755% | 785  | 649.1  | 961.0  | 567  | 415.5 | 824.3  | 1.723796 | 0.384495 |
| T20  | 9954  | 149 | 99.0958% | 786  | 653.4  | 953.2  | 331  | 250.2 | 476.4  | 1.84007  | 0.336294 |
| T21  | 10678 | 204 | 98.7076% | 1366 | 1163.0 | 1612.9 | 702  | 491.8 | 1063.9 | 2.095248 | 0.242792 |
| T22  | 7519  | 238 | 97.8854% | 1544 | 1324.5 | 1808.5 | 784  | 567.5 | 1143.2 | 2.53784  | 0.157693 |
| T23  | 7865  | 240 | 98.1691% | 1069 | 913.4  | 1261.2 | 621  | 472.1 | 866.5  | 2.845057 | 0.119943 |
| T24  | 6186  | 201 | 98.2541% | 618  | 524.8  | 736.9  | 400  | 318.3 | 539.3  | 2.570513 | 0.171021 |
| T25  | 8304  | 375 | 97.3748% | 1734 | 1543.3 | 1955.5 | 1032 | 806.7 | 1374.9 | 3.758756 | 0.055153 |
| T26  | 8597  | 242 | 98.2203% | 1216 | 1043.1 | 1425.5 | 605  | 469.0 | 823.7  | 2.318289 | 0.197002 |
| T27  | 7429  | 311 | 97.5905% | 1113 | 975.2  | 1280.2 | 754  | 595.9 | 998.3  | 3.295123 | 0.074561 |
| T28  | 6657  | 359 | 96.9506% | 1381 | 1222.4 | 1569.7 | 815  | 662.7 | 1042.4 | 3.579842 | 0.07813  |
| T29  | 8937  | 221 | 98.3887% | 1042 | 875.6  | 1251.5 | 617  | 461.0 | 874.5  | 1.935574 | 0.285902 |
| T30  | 8623  | 220 | 98.4924% | 875  | 750.3  | 1028.6 | 453  | 363.9 | 597.1  | 2.233318 | 0.265204 |
| T31  | 7307  | 186 | 98.4672% | 904  | 770.4  | 1068.5 | 456  | 342.2 | 653.5  | 2.458177 | 0.149126 |
| T32  | 9403  | 270 | 98.3516% | 972  | 847.6  | 1123.7 | 621  | 491.0 | 827.7  | 1.938958 | 0.41724  |
| T33  | 9209  | 221 | 98.4363% | 1255 | 1059.9 | 1495.4 | 650  | 478.4 | 935.9  | 2.182132 | 0.200203 |
| T34  | 8453  | 192 | 98.4266% | 1689 | 1451.6 | 1971.3 | 741  | 499.9 | 1169.5 | 2.013253 | 0.243916 |
| T35  | 5975  | 354 | 96.2510% | 2165 | 1918.2 | 2451.2 | 935  | 743.6 | 1219.9 | 3.477414 | 0.084811 |
| UT01 | 8340  | 281 | 98.0456% | 1111 | 971.8  | 1278.5 | 694  | 540.7 | 936.5  | 2.314617 | 0.262553 |

|      |       |     |          |      |        |        |      |       |        |          |          |
|------|-------|-----|----------|------|--------|--------|------|-------|--------|----------|----------|
| UT02 | 11197 | 193 | 98.9015% | 812  | 666.3  | 1001.3 | 427  | 335.2 | 579.7  | 1.988179 | 0.229832 |
| UT03 | 9372  | 351 | 98.0154% | 998  | 885.3  | 1133.9 | 702  | 584.3 | 879.4  | 2.553476 | 0.262693 |
| UT04 | 8880  | 302 | 98.1306% | 925  | 807.2  | 1070.2 | 571  | 478.3 | 711.1  | 2.963957 | 0.110812 |
| UT05 | 5643  | 327 | 96.4735% | 1399 | 1230.7 | 1599.7 | 737  | 601.5 | 940.7  | 2.901321 | 0.151959 |
| UT06 | 11927 | 205 | 98.8849% | 1095 | 931.1  | 1295.8 | 693  | 483.8 | 1058.1 | 1.510835 | 0.437909 |
| UT07 | 10976 | 189 | 98.9249% | 897  | 754.3  | 1076.9 | 518  | 378.3 | 759.9  | 2.166056 | 0.229721 |
| UT08 | 9385  | 318 | 97.9116% | 1516 | 1330.4 | 1736.6 | 796  | 631.9 | 1045.1 | 2.108443 | 0.371395 |
| UT09 | 7628  | 216 | 98.1384% | 1026 | 850.8  | 1249.3 | 601  | 448.9 | 852.4  | 2.302734 | 0.194369 |
| UT10 | 6195  | 247 | 97.4657% | 1176 | 1006.4 | 1384.1 | 892  | 624.9 | 1346.4 | 2.611248 | 0.191843 |
| UT11 | 8057  | 292 | 97.8032% | 1243 | 1083.1 | 1435.2 | 663  | 533.9 | 860.5  | 2.314879 | 0.252497 |
| UT12 | 6792  | 248 | 97.7326% | 1279 | 1111.0 | 1480.5 | 566  | 449.8 | 750.3  | 2.538628 | 0.19706  |
| UT13 | 7415  | 384 | 96.7633% | 2101 | 1877.9 | 2356.3 | 1203 | 925.4 | 1624.2 | 2.842268 | 0.241447 |
| UT14 | 8159  | 339 | 97.6713% | 1093 | 964.5  | 1248.3 | 747  | 608.5 | 956.9  | 2.282657 | 0.345084 |
| UT15 | 8286  | 166 | 98.8535% | 582  | 490.6  | 698.1  | 338  | 264.0 | 466.9  | 1.533477 | 0.369419 |
| UT16 | 6175  | 278 | 96.8907% | 2325 | 2038.8 | 2658.3 | 889  | 666.7 | 1239.2 | 2.299705 | 0.314296 |
| UT17 | 8905  | 352 | 97.4958% | 1752 | 1548.9 | 1990.2 | 1003 | 783.4 | 1335.5 | 2.167558 | 0.336687 |
| UT18 | 6383  | 193 | 98.0417% | 1145 | 954.3  | 1384.7 | 562  | 407.0 | 829.3  | 2.521379 | 0.147785 |
| UT19 | 8203  | 160 | 98.8419% | 717  | 595.6  | 872.6  | 458  | 318.8 | 717.8  | 1.964169 | 0.290236 |
| UT20 | 6263  | 253 | 97.6369% | 997  | 867.2  | 1155.5 | 555  | 443.1 | 733.4  | 2.161628 | 0.316482 |
| UT21 | 7020  | 293 | 97.2650% | 1560 | 1359.0 | 1799.5 | 832  | 640.8 | 1129.2 | 2.745715 | 0.144268 |
| UT22 | 4717  | 211 | 97.3924% | 818  | 695.6  | 972.2  | 479  | 371.4 | 658.7  | 3.03967  | 0.091952 |
| UT23 | 5798  | 265 | 96.9472% | 1471 | 1267.7 | 1716.1 | 752  | 574.2 | 1031.2 | 2.544628 | 0.159734 |
| UT24 | 6480  | 210 | 97.8704% | 1059 | 872.7  | 1297.7 | 574  | 429.2 | 813.1  | 2.600581 | 0.144595 |
| UT25 | 7936  | 374 | 97.1774% | 1478 | 1316.5 | 1666.6 | 1109 | 854.9 | 1496.2 | 2.56309  | 0.243041 |
| UT26 | 6167  | 363 | 96.6921% | 1221 | 1081.8 | 1388.1 | 794  | 652.3 | 1006.2 | 3.445924 | 0.087257 |
| UT27 | 6350  | 367 | 96.8346% | 1366 | 1218.6 | 1538.5 | 769  | 637.0 | 965.5  | 3.573733 | 0.08645  |
| UT28 | 8634  | 328 | 97.9036% | 1119 | 983.1  | 1284.1 | 698  | 571.1 | 891.8  | 3.134086 | 0.106659 |
| UT29 | 8268  | 294 | 98.1737% | 840  | 738.7  | 964.3  | 516  | 437.8 | 636.9  | 2.761314 | 0.144179 |



---

|      |      |     |          |      |        |        |     |       |        |          |          |
|------|------|-----|----------|------|--------|--------|-----|-------|--------|----------|----------|
| UT30 | 9386 | 179 | 98.7322% | 860  | 708.3  | 1055.0 | 484 | 356.9 | 702.7  | 1.973697 | 0.235656 |
| UT31 | 6542 | 245 | 97.6154% | 1009 | 863.3  | 1189.3 | 677 | 511.4 | 944.8  | 2.838396 | 0.101848 |
| UT32 | 5992 | 306 | 96.8959% | 1297 | 1134.8 | 1490.0 | 759 | 600.3 | 1002.4 | 3.154315 | 0.095472 |

---
